# Supplementary material for: Differences in the reliance on cuticular hydrocarbons as sexual signaling and species discrimination cues in parasitoid wasps
Source: PubMed Central journal article supplement (PMC5946414; doi:10.1186/s12983-018-0263-z), 2018-05-10

*N. vitripennis* (N.A.)

■ Courtship  
■ Copulation

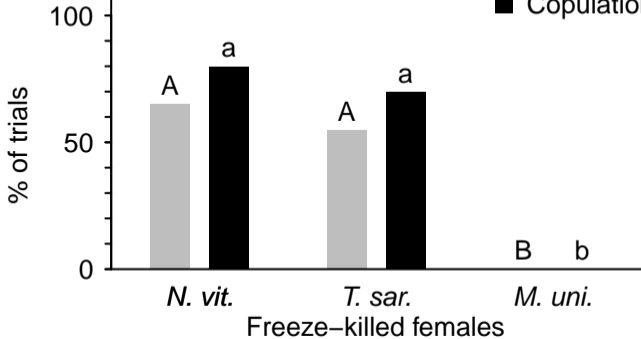

Supplement: 12983_2018_263_MOESM1_ESM.pdf [file 12983_2018_263_MOESM1_ESM.pdf]
